# Supplementary material
Source: publisher figshare collection journal article supplement (https://springernature.figshare.com/ndownloader/files/13512152)

## CASE REPORT FORM (CRF)

### Enrolment and Demographics

Record ID \_\_\_\_\_

MR Number \_\_\_\_\_

Last Name \_\_\_\_\_

First Name \_\_\_\_\_

Address \_\_\_\_\_

Date of Birth \_\_\_\_\_  
(Use the calendar or DAY-MONTH-YEAR)

Age (if no age, adult) \_\_\_\_\_

Sex      Male      ☐                      Female      ☐

Date of EMD Care \_\_\_\_\_  
(Use the calendar or DAY-MONTH-YEAR)

Time of EMD Care \_\_\_\_\_

Patient phone number \_\_\_\_\_

Relative phone number \_\_\_\_\_

### Marital status

- ☐ Single
- ☐ Married
- ☐ Divorced
- ☐ Widowed

Name of the referring facility \_\_\_\_\_

Level of referring facility

- ☐ Dispensary

- ☐ Health center
- ☐ District Hospital
- ☐ Regional hospital
- ☐ Police hospital
- ☐ Military hospital
- ☐ Private hospital
- ☐ Private clinic
- ☐ Reason for referral \_\_\_\_\_

Chief Complaint # 1 \_\_\_\_\_

Chief Complaint # 2 \_\_\_\_\_

Chief Complaint # 3 \_\_\_\_\_

Mechanism of Injury \_\_\_\_\_

### **Chief Complaint Category**

- ☐ Assault (Any complaint described as an assault)
- ☐ Limb Injury (any injury of legs or arms or toes or Fingers or other unspecified)
- ☐ Wound (any complaint of wounds including Lacerations or cut)
- ☐ Stab wound (Any complaint of stab wound)
- ☐ MVC (Any injury from motor vehicle crash)
- ☐ Fall (any complaint of injury from fall)
- ☐ Animal Bite (any complaint of animal bite)
- ☐ Burn (Any complaint of burn injury)

- ☐ Head Injury
- ☐ GSW (Any complaint of gunshot wound)
- Miscellaneous injury (all other unclassified injury)

**MOI category**

- ☐ Car/Truck- driver
- ☐ Car/Truck- passenger
- ☐ Car/Truck- unknown position
- ☐ Pedestrian struck by car/truck
- ☐ Motorcycle- driver
- ☐ Motorcycle- passenger
- ☐ Motorcycle- unknown position
- ☐ Pedestrian struck by motorcycle
- ☐ Daladala-driver
- ☐ Daladala-passenger
- ☐ Pedestrian struck by Daladala
- ☐ Bajaj- driver
- ☐ Bajaj- passenger
- ☐ Pedestrian struck by bajaj
- ☐ Long distance bus- driver
- ☐ Long distance bus- passenger
- ☐ Pedestrian hit by long distance bus

- ☐ Other blunt injury
- ☐ Knife wound
- ☐ Gunshot wound
- ☐ Other penetrating injury
- ☐ Fall
- ☐ Unknown
- ☐ Burn
- ☐ Bicycle/ pedal cycle
- ☐ Pedestrian struck by train
- ☐ Other

Other, description \_\_\_\_\_

Date of Injury \_\_\_\_\_  
(Use the calendar or DAY-MONTH-YEAR)

Time of injury \_\_\_\_\_

Motive of Injury

- ☐ Intentional ☐ Unintentional
- ☐ Unknown

Alcohol use Confirmed by patient

- ☐ Confirmed by alcohol test ☐ Suspected by care provider
- ☐ Suspected or reported by relative/accompanying person ☐ Unknown

**Vitals**

SBP \_\_\_\_\_

DBP \_\_\_\_\_

PULSE \_\_\_\_\_

RR \_\_\_\_\_

SPO2 (RA) \_\_\_\_\_

TEMP \_\_\_\_\_

Total GCS at EMD \_\_\_\_\_

**Initial pain assessment and documentation at Triage**YES ☐ NO ☐**Physician pain assessment and documentation at treatment/ Resuscitation**YES ☐ NO ☐Consent; YES ☐ NO ☐**Pain Assessment****How much is your pain in a scale of 1 to 10?**

(1 being no pain, 10 being worst possible pain) \_\_\_\_\_

**Pain Medications**Given YES ☐ NO ☐

Time Given \_\_\_\_\_

**Type of pain medications**

- ☐ NSAIDS
- ☐ Acetaminophen
- ☐ Opioids
- ☐ Other  
Other medications \_\_\_\_\_

**Route of administration of pain medications**

- ☐ IM
- ☐ IV
- ☐ Oral
- ☐ Other  
Other route \_\_\_\_\_

**Diagnosis**

EMD Diagnosis 1 \_\_\_\_\_

EMD Diagnosis 2 \_\_\_\_\_

EMD Diagnosis 3 \_\_\_\_\_

EMD Diagnosis 4 \_\_\_\_\_

**Disposition**

- ☐ EMD Disposition Home
- ☐ MNH Ward
- ☐ MNH HDU

☐ MNH ICU

☐ Transfer to MOI

☐ Transfer to other

**Appendix IV: Numerical rating scale**

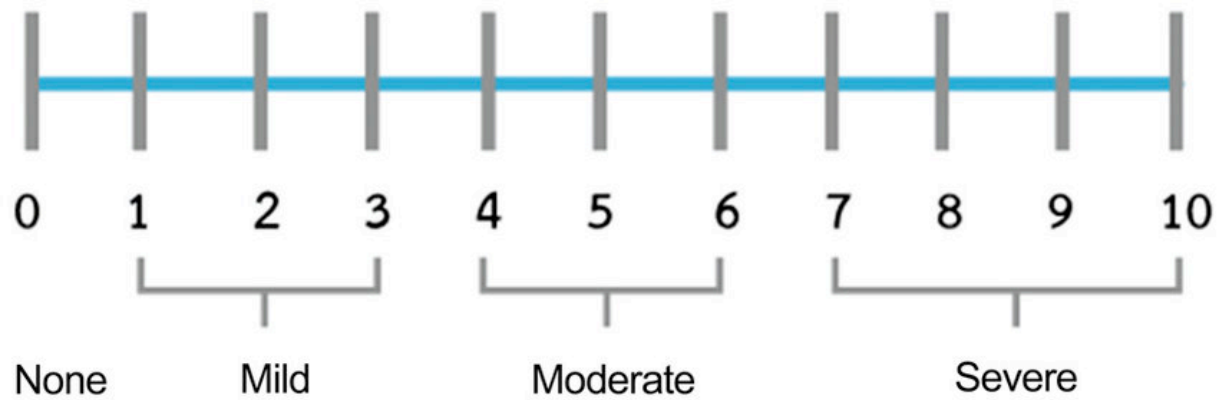

Supplement: Supplementary file 1 [file 13512152]
